# Supplementary material
Source: publisher figshare collection journal article supplement (https://acs.figshare.com/ndownloader/files/3609288)
Supplement: Supplementary file 1 [file 3609288]

## Supplementary Information

### Substrate specificity of the lanthipeptide peptidase ElxP and the oxidoreductase ElxO

Manuel A. Ortega<sup>1||</sup>, Juan E. Velásquez<sup>2||</sup>, Neha Garg<sup>1</sup>, Qi Zhang<sup>2</sup>, Rachel Joyce<sup>1</sup>, Satish K. Nair<sup>\*1,2</sup> and Wilfred A. van der Donk<sup>1,2,3\*</sup>

Departments of <sup>1</sup>Biochemistry, <sup>2</sup>Chemistry, and <sup>3</sup>the Howard Hughes Medical Institute, University of Illinois at Urbana-Champaign, 600 S Mathews Ave. Urbana IL, 61801, USA. [s-nair@life.illinois.edu](mailto:s-nair@life.illinois.edu), [vddonk@illinois.edu](mailto:vddonk@illinois.edu)

\* Authors to whom correspondence should be addressed

#### Markov chain Monte Carlo phylogenetic tree analysis

The LanP sequences were aligned in ClustalX<sup>1</sup> using default parameters with iteration at each alignment step, and the alignments were manually fine-tuned afterwards. Bayesian inference was used to calculate posterior probability of clades utilizing the program MrBayes<sup>2</sup> (version 3.2). Final analyses consisted of two sets of eight chains each (one cold and seven heated), run to reach a convergence with standard deviation of split frequencies <0.005. Posterior probabilities were averaged over the final 75% of trees (25% burn in). The analysis utilized a mixed amino acid model with a proportion of sites designated invariant, and rate variation among sites modeled after a gamma distribution divided into eight categories, with all variable parameters estimated by the program based on BioNJ starting trees. Accession numbers are listed in the Supplementary Table 1.

#### Expression and purification of MBP-ElxP

The cloning of the gene encoding ElxP is described elsewhere.<sup>3</sup> An aliquot of 50 ng of *pelB-mbp-elxP-pET28b* was used to transform 50  $\mu$ L of electrocompetent *Escherichia coli* BL21 (DE3) Rosetta 2 cells following standard procedures. After the incubation period, cells were plated on LB agar (LBA) plates supplemented with kanamycin (kan, 25  $\mu$ g mL<sup>-1</sup>) and chloramphenicol (cam, 12.5  $\mu$ g mL<sup>-1</sup>) and grown at 37 °C overnight. A single colony was used to inoculate 1 mL of fresh LB supplemented with kan and cam and 1  $\mu$ L was plated for a second time on LBA plates supplemented with kan and cam. Plates were kept at 37 °C overnight. For overexpression, 1 mL of LB supplemented with kan and cam was used to scrape the cells out of the overnight LBA plates to be used as initial inoculum. Overexpression was performed in 6 L of LB supplemented with kan and cam with a starter OD<sub>600</sub> of 0.025. Cultures were incubated at 37 °C, 250 rpm until the OD<sub>600</sub> reached ~1.0. At this OD, cultures were chilled on ice for 15 min and protein expression was induced with 0.1 mM isopropyl- $\beta$ -D-1-thiogalactopyranoside (IPTG). Protein overexpression was carried out at 18 °C, 250 rpm for 16 h. The cells were harvested (6976 xg, 20 min, 4 °C), resuspended in 50 mL of lysis buffer (20 mM Tris-HCl pH 8.0, 500 mM NaCl, 10% (v/v) glycerol, 1 mM EDTA) and lysed using an EmulsiFlex-C3 homogenizer with a pressure of less than 500 bar. To remove cell debris, the lysed fraction was centrifuged (22,789 xg, 4 °C, 30 min) and the supernatant was cleared through a 0.45  $\mu$ m syringe-tip filter (Millipore). The protein was purified by affinity chromatography using an ÄKTA purifier (GE healthcare) equipped with an MBPTrap HP 5 mL column pre-packed with Dextrin Sepharose<sup>TM</sup> (GE healthcare) according to the manufacturer's protocol. After loading the supernatant into the column pre-equilibrated with lysis buffer, the column was washed with lysis buffer until a stable baseline based on absorbance at 280 nm for the absorbance was reached. Protein was eluted with a linear gradient from 0–100% (v/v) of elution buffer (20 mM Tris-HCl pH 8.0, 500 mM NaCl, 1 mM EDTA, 10 mM maltose) in lysis buffer over 30 min. Collected fractions were analyzed by SDS-PAGE using a 4–20% TGX mini-protein gel (BioRad) and visualized by Coomassie staining. Fractions containing the desired MBP-ElxP were collected and desalted using gel filtration chromatography on a HiLoad 16/60 column packed with Superdex 200 PG eluting with 1 mL min<sup>-1</sup> of gel filtration buffer (300 mM NaCl, 20 mM Tris-HCl pH 8.0, 10% (v/v) glycerol). Protein was concentrated using an Amicon Ultra centrifuge tube of 30 kDa molecular weight cut off (MWCO) (3,488 xg, 30 min, 4 °C) (Millipore). The concentration of the purified protein was determined spectrophotometrically using a calculated molar extinction coefficient of 113,485 M<sup>-1</sup> cm<sup>-1</sup> and a molecular weight of 80.504 kDa. Purity was assessed by

SDS-PAGE analysis (Supplementary Figure 1). Aliquots were frozen in liquid nitrogen for future use and stored at  $-80^{\circ}\text{C}$ .

#### **Cloning, expression, and purification of His<sub>6</sub>-ElxA and mutant variants**

The cloning of the gene encoding ElxA into *pET28b* is described elsewhere.<sup>3</sup> The ElxA leader peptide variants were constructed using QuikChange mutagenesis following a previously described method.<sup>4</sup> The *his<sub>6</sub>-elxA-pET28b* was used as a template to introduce the different mutations by PCR using the corresponding primer pair listed in the Supplementary Table 5. A typical PCR reaction consisted of 1X HF Buffer, 0.2 mM DNTP, 1  $\mu\text{M}$  forward and reverse primers, 10 ng template DNA, 3% (v/v) DMSO and 0.02 U  $\mu\text{L}^{-1}$  Phusion polymerase (NEB). After PCR, reactions were incubated at  $37^{\circ}\text{C}$  for 2 h with DpnI (5 U). After treatment with DpnI, samples were purified using the QIAquick PCR purification kit (Qiagen). An aliquot of 10  $\mu\text{L}$  was used to transform *E. coli* DH5 $\alpha$  cells using the heat shock method and cells were plated on LBA plates supplemented with kan (50  $\mu\text{g mL}^{-1}$ ). Plates were incubated at  $37^{\circ}\text{C}$  overnight. A single colony was inoculated in LB supplemented with kan, grown at  $37^{\circ}\text{C}$  overnight, and plasmid was extracted using the QIAprep spin mini prep kit (Qiagen). The desired mutations were verified by DNA sequencing.

Overexpression and purification of wild type ElxA and mutant variants was carried out using a previously described method with minor modifications.<sup>3</sup> An aliquot of 50 ng of recombinant DNA from wild type ElxA and each of the mutants described above was used to transform 50  $\mu\text{L}$  of electrocompetent *E. coli* BL21 (DE3) cells and plated on LBA supplemented with kan (50  $\mu\text{g mL}^{-1}$ ) at  $37^{\circ}\text{C}$  overnight. A single colony was used to inoculate a starter inoculum of LB supplemented with kan and incubated at  $37^{\circ}\text{C}$  for 12 h. After the incubation period, 6 L of Terrific Broth (TB) supplemented with kan, and glycerol (4  $\text{mL L}^{-1}$ ), were inoculated with the starter culture to obtain an initial  $\text{OD}_{600}$  of 0.025. Flasks were incubated at  $37^{\circ}\text{C}$ , 250 rpm, and peptide expression was induced at  $18^{\circ}\text{C}$ , 250 rpm for 18 h with 1.0 mM IPTG when the  $\text{OD}_{600}$  reached 1.0. Cells were harvested by centrifugation (6,976 xg, 20 min,  $4^{\circ}\text{C}$ ), resuspended in 30 mL of LanA Buffer 1 (6 M guanidine hydrochloride, 20 mM  $\text{NaH}_2\text{PO}_4$  pH 7.5, 500 mM NaCl and 0.5 mM imidazole) and lysed by sonication (35% amplitude, 4.0 s pulse, 9.9 s pause, 15 min). Cell debris was removed by centrifugation (22789 xg, 30 min,  $4^{\circ}\text{C}$ ) and supernatant was filtered through a 0.45  $\mu\text{m}$  syringe filter unit. Purification was carried out using a 5 mL HisTrap column pre-packed with Ni Sepharose<sup>TM</sup>. After loading the supernatant into the column, the column was washed with 10 column volumes (CV) of LanA Buffer 1 followed by 10 CV of LanA Buffer 2 (4 M guanidine hydrochloride, 20 mM  $\text{NaH}_2\text{PO}_4$  pH 7.5, 300 mM NaCl and 30 mM imidazole) to remove any non-specifically bound proteins, followed by peptide elution in 3 CV of LanA Elution Buffer (4 M guanidine hydrochloride, 20 mM Tris HCl pH 7.5, 100 mM NaCl, 1 M imidazole). To remove excess salts, the peptide was purified by reversed phase high performance liquid chromatography (RP-HPLC) using a C<sub>4</sub> Waters Delta Pak cartridge column with a linear gradient of 2% (v/v) of solvent A [80% (v/v) MeCN, 20% (v/v)  $\text{H}_2\text{O}$ , 0.086% (v/v) trifluoroacetic acid (TFA)] in solvent B [0.1% (v/v) TFA in  $\text{H}_2\text{O}$ ] to 75% (v/v) solvent A over 30 min. Fractions were analyzed for the desired peptide by matrix assisted laser desorption ionization time-of-flight mass spectrometry (MALDI-TOF MS). Fractions containing peptide were freeze dried using a lyophilizer (Labconco) and stored at  $-20^{\circ}\text{C}$ . The purity of each peptide was assessed by analytical HPLC.

#### **Cloning, expression, and purification of His<sub>6</sub>-NisA and mutant variants**

The cloning of the gene encoding NisA into *pRSF Duet-1* is described elsewhere.<sup>5</sup> The NisA leader peptide variants were constructed using QuikChange mutagenesis. The *his<sub>6</sub>-nisA-pRSF Duet-1* plasmid was used as a template to introduce the different mutations by PCR using the corresponding primer pair listed in the Supplementary Table 5. PCR conditions, overexpression, and purification of peptides were performed as described above.

#### **Determination of ElxP kinetic parameters**

The kinetic parameters of MBP-ElxP were determined using an HPLC based assay following a previously described method.<sup>6</sup> The peptidase activity of tagged ElxP was assayed in a 100  $\mu\text{L}$  reaction mixture containing 50 mM Tris pH 8.0, and various concentrations of wild type His<sub>6</sub>-ElxA or mutant variants. The reaction was started by adding MBP-ElxP to a final concentration such as to consume less than 10% of the initial substrate concentration in the time frame of the assay. The enzyme concentration ranged from 0.25  $\mu\text{M}$  to 1  $\mu\text{M}$ . The reaction was incubated at room temperature and quenched in 0.1% (v/v) TFA and 5 mM

*tris*(2-carboxyethyl)phosphine (TCEP) at different time points. The reactions were loaded on a Hypersil Gold C<sub>4</sub> (250 x 4.6 mm, 5  $\mu$ ) analytical column (Thermo Fisher Scientific) connected to an Agilent 1260 Liquid Chromatography (HPLC) system (Agilent Technologies). Product formation was detected by monitoring the increase in the peak area of the leader peptide at 220 nm (Supplementary Figure 2). The leader peptide was separated from the unmodified core and precursor peptide using a linear gradient from 2% to 75% (v/v) of solvent A [80% (v/v) MeCN, 20% (v/v) H<sub>2</sub>O, 0.086 % (v/v) TFA] in solvent B [0.1% (v/v) TFA in H<sub>2</sub>O] over 30 min at a flow rate of 1 mL min<sup>-1</sup> at room temperature. The concentration of the leader peptide was calculated by converting the area under the leader peptide peak to leader peptide concentration using a calibration curve made from purified leader peptide (Supplementary Figure 3). Rates of leader peptide formation were then plotted against substrate concentration and the resulting graph was fit to the Michaelis-Menten equation. Values were plotted as the average and standard error of two independent experiments. Reactions were performed with tagged enzymes and substrates unless otherwise noted.

### Synthesis of ElxO substrate analogs

Peptides were synthesized on a 0.1 mmol or 0.15 mmol scale by Fmoc-based SPPS using a PS3 peptide synthesizer (Protein Technologies) or an Apex SC-396 Peptide Synthesizer (Advanced Chemtech). Fmoc groups were removed during the deprotection steps with 20% (v/v) piperidine in *N,N*-dimethylformamide (DMF) for 3 x 3 min. Coupling of the amino acids was performed for 1–1.5 h with 0.5 or 0.75 mmol (five equiv.) of each Fmoc-AA and using DMF as solvent and 2-(6-chloro-1H-benzotriazole-1-yl)-1,1,3,3-tetramethylaminium hexafluorophosphate (HCTU) with 0.4 M *N*-methylmorpholine (NMM) or hydroxybenzotriazole (HOBt) with diisopropylcarbodiimide (DIC) as activating reagents. Coupling reactions of pyruvic acid or  $\alpha$ -ketobutyric acid were performed twice for 1–1.5 h using 5 equiv. of acid in the presence of HOBt and DIC. After completion of synthesis, peptidyl-resins were washed with DMF and ethanol, and dried under reduced pressure. Peptides were cleaved from the resins using a mixture of TFA/water/phenol (90:5:5) for 2 h. For Pyr-MAIVK a cleavage cocktail containing TFA/water/phenol/thioanisole /mercaptoethanol (82.5:5:5:5:2.5) was used, and for Pyr-YAIVK, Pyr-TAIVK, Pyr-RAIVK, and Obu-RAIVK a cleavage mixture of TFA/water/phenol/thioanisole (85:5:5:5) was used. The cleavage solutions were evaporated in a rotary evaporator to remove TFA and the peptides were precipitated from the solution with cold diethyl ether. The precipitated materials were resuspended in 0.1% (v/v) TFA in acetonitrile/water (50:50) and lyophilized to dryness. The synthesis of Glx-AAIVK was performed by oxidation of SAAIVK (5 mM) with sodium periodate (10 mM) in sodium phosphate buffer (40 mM, pH 7.5) for 5 min, followed by quenching with sodium sulfite (40 mM).<sup>7</sup> The peptides were purified by semi preparative reversed phase HPLC using an Agilent 1200 instrument equipped with an Eclipse XDB-C18 column (9.4 mm x 250 mm, Agilent) or a Synergi Fusion-RP column (9.4 mm x 150 mm, Phenomenex) and a variable wavelength detector set at 220 nm. The mobile phase was 0.1% (v/v) formic acid in water (solvent A) and acetonitrile (solvent B). A gradient of 2-30% (v/v) solvent B in solvent A and a flow rate of 4 mL min<sup>-1</sup> were used. The masses of the purified peptides were determined by ESI-MS using a Waters ZMD quadrupole Instrument at the Mass Spectrometry Laboratory of the University of Illinois at Urbana-Champaign.

### Production of dihydrolactocin S

Synthetic lactocin S (50  $\mu$ M), obtained from Prof. J. Vederas (University of Alberta),<sup>8</sup> was incubated with His<sub>6</sub>-ElxO (50  $\mu$ M) and NADPH (10 mM) in assay buffer (100 mM HEPES, 500 mM NaCl, pH 7.5) at room temperature for 12 h. The formation of reduced peptide was confirmed by LC-MS using a Waters SYNAPT<sup>TM</sup> mass spectrometry system equipped with a ACQUITY UPLC<sup>®</sup>, an ESI ion source, a quadrupole time-of-flight detector, and a ACQUITY Bridged Ethyl Hybrid (BEH) C8 column (2.1 mm x 50 mm, 1.7  $\mu$ m, Waters). A gradient of 3-97% (v/v) B (0.1% (v/v) formic acid in methanol) in A (0.1% (v/v) formic acid in water) over 12 min was used.

### Determination of the ElxO x-ray crystal structure

Apo-ElxO was concentrated to a final concentration of 0.4 mM by centrifugal filters, and incubated with five-fold excess of freshly prepared NADPH. The solution was incubated on ice for 2 h prior to crystallization. Crystals of the ElxO wild type enzyme in complex with NADPH were grown using the hanging drop vapor diffusion technique. Commercially available sparse matrix screens were used to identify initial crystallization conditions using the Hampton Matrix crystallization screen. The initial

condition (Natrix 39) was optimized to 0.1 M ammonium acetate, 0.02 M magnesium chloride, 0.05 M HEPES-Na (pH 7.5), 8% (v/v) PEG 800, and 5% (v/v) glycerol. Crystals were obtained by adding 1  $\mu$ L of the protein to an equal volume of the crystallization mother liquor equilibrated against the same solution at 9 °C. Crystals were vitrified by soaking in crystallization condition supplemented with 30% (v/v) glycerol prior to direct immersion in liquid nitrogen. All X-ray diffraction data were collected at the Life Sciences Collaborative Access Team (Sector-21) Argonne National Laboratory (Lemont, IL).

The diffraction data was indexed and scaled using HKL2000<sup>9</sup> to a limiting resolution of 1.85 Å. The coordinates from three models (PDB ids: 2HQI, 2UVD, and 2CFC) were superimposed to generate a search model for molecular replacement. All water and ligand atoms from the search model were deleted, and non-conserved amino acid side chains reduced to alanine. A five-fold redundant native dataset for the ElxO-NADPH complex crystal was used.

Following rigid body refinement of the initial MR solution, phases from the resultant model were further improved by two fold density averaging allowing for a significant portion of the model to be manually rebuilt using XtalView.<sup>10</sup> Further manual fitting was interspersed with automated rebuilding using ARP/wARP<sup>11</sup> and rounds of refinement using REFMAC5.<sup>12, 13</sup> Cross-validation, using 5% of the data for the calculation of the free R factor,<sup>14</sup> was utilized throughout the model building process in order to monitor building bias. Although clear density for NADPH could be observed prior to crystallographic refinement, the ligand was manually built into the model only after the free R factor dropped below 30%. The stereochemistry of the models was routinely monitored throughout the course of refinement using PROCHECK.<sup>15</sup> Crystallographic data summary for ElxO is presented in Supplementary Table 4.

#### Supplementary Figures and Tables:

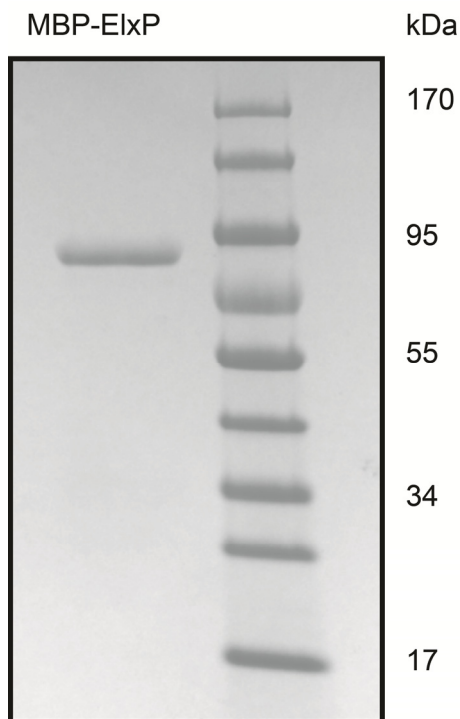

**Supplementary Figure 1.** SDS-PAGE analysis of purified recombinant MBP tagged ElxP.

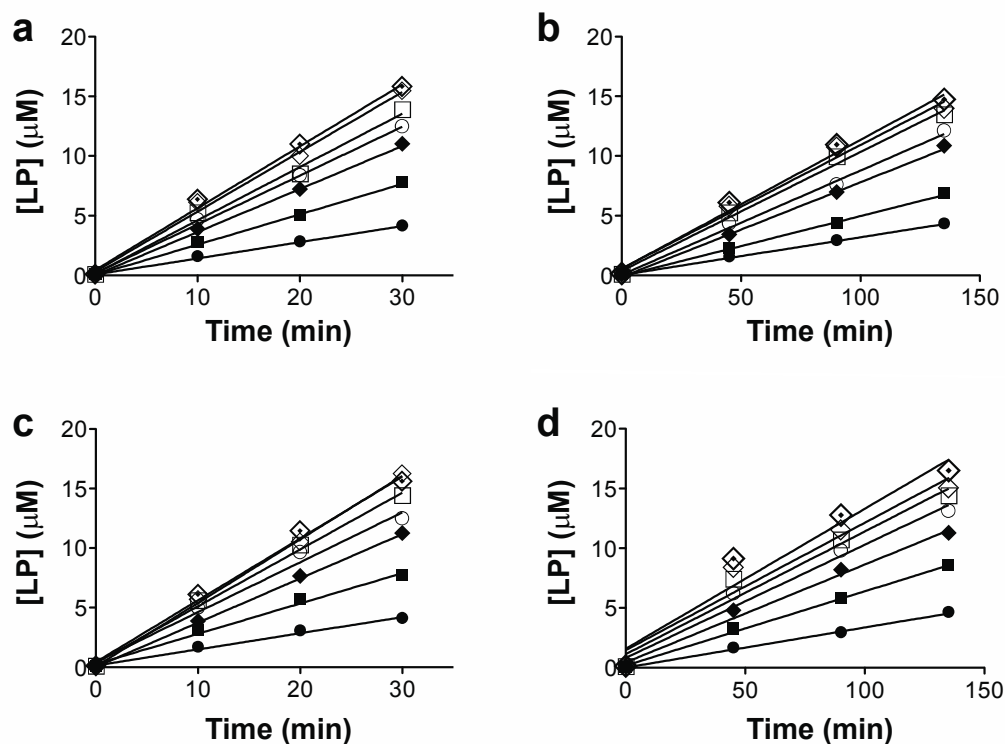

**Supplementary Figure 2.** Time dependent formation of the *N*-terminal leader peptide upon treatment of His<sub>6</sub>-ElxA and its variants with MBP-ElxP. a) His<sub>6</sub>-ElxA, b) His<sub>6</sub>-ElxA Q-1A, c), His<sub>6</sub>-ElxA P-2A, and d) His<sub>6</sub>-ElxA L-4A were incubated at different concentrations (• 50  $\mu$ M, ■ 100  $\mu$ M, ♦ 150  $\mu$ M, ○ 200  $\mu$ M, □ 250  $\mu$ M, ◇ 300  $\mu$ M, ◇ 350  $\mu$ M) with MBP-ElxP and leader peptide formation (LP) was monitored at different time points by RP-HPLC. Data was fit to a linear regression to obtain enzymatic rates.

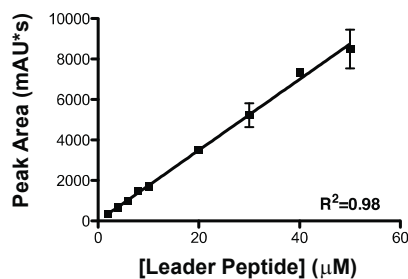

**Supplementary Figure 3.** ElxA leader peptide standard curve. The absorbance of different concentrations of purified His tagged ElxA leader peptide was determined by analytical HPLC using absorbance at 220 nm for detection. Linearity was observed up to 50  $\mu$ M leader peptide. Data plotted represents the average of two independent runs and error bars represent the standard error associated with the measurements.

↓

|                                    |                                              |
|------------------------------------|----------------------------------------------|
| NisA                               | -KDFNLDLVSVSK-KDS <b>ASPR</b> ITS-           |
| NisA R-1Q                          | -KDFNLDLVSVSK-KDSGASP <b>Q</b> ITS-          |
| NisA R-1Q/Q-1_linsA                | -KDFNLDLVSVSK-KDSGASP <b>Q</b> <b>A</b> ITS- |
| NisA G-5D/A-4L/S-3N/R-1Q           | -KDFNLDLVSVSK-KDS <b>DLNPQ</b> ITS-          |
| NisA G-5D/A-4L/S-3N/R-1Q/Q-1_linsA | -KDFNLDLVSVSK-KDS <b>DLNPQ</b> <b>A</b> ITS- |
| ElxA                               | -ELFDLNLNKDIEAQKS <b>DLNPQ</b> SAS-          |

**Supplementary Figure 4.** Leader peptide sequences of NisA variants. The cleavage recognition sequence of NisA is shown in blue. Amino acid mutations in the NisA variants are shown in red. ElxA leader peptide sequence is shown for reference. LanP cleavage site is shown with an arrow.

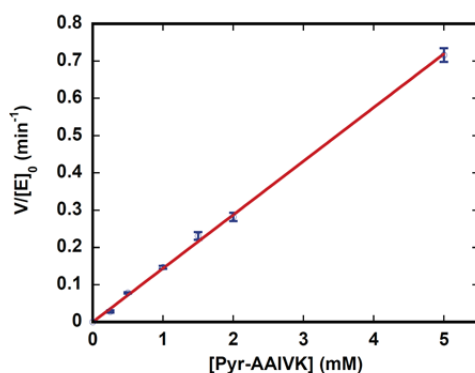

**Supplementary Figure 5.** Dependence of the reaction rate of reduction by His<sub>6</sub>-ElxO on the Pyr-AAIVK concentration using 2.5 mM NADPH as co-substrate. Saturation of the enzyme with the peptide substrates was not achieved even at high peptide concentration (5 mM).

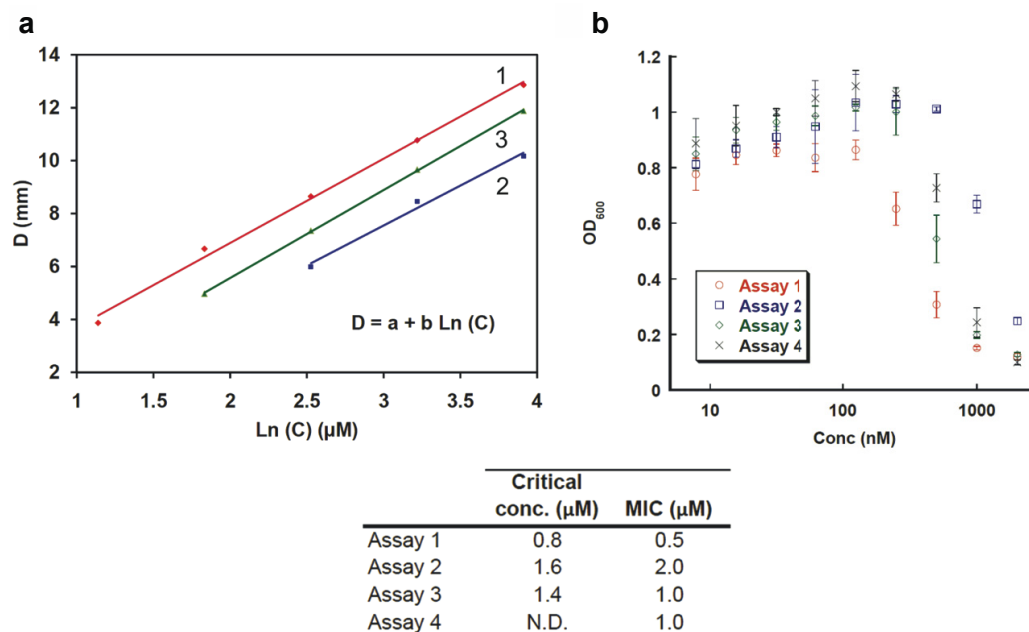

**Supplementary Figure 6.** a) The sizes of the inhibition zones of the serial dilution agar diffusion bioactivity assays (Figure 6) were determined and fit to a linear model to establish the critical concentration ( $D = 0$ ).<sup>16</sup> Assay 1: sample containing enzymatically synthesized dihydrolactocin S, assay 2: control sample containing lactocin S but lacking ElxO, assay 3: control sample containing lactocin S but lacking cofactor, assay 4: control sample containing lactocin S but lacking enzyme and cofactor. N.D., not determined. b) Apparent minimal inhibitory concentrations (MIC) determined by a serial dilution bioactivity assay in liquid media of a solution containing dihydrolactocin S produced enzymatically compared with the control samples containing lactocin S. The MIC values were determined based on the smallest concentration of antibiotic that caused  $OD_{600}$  to be less than 0.3.

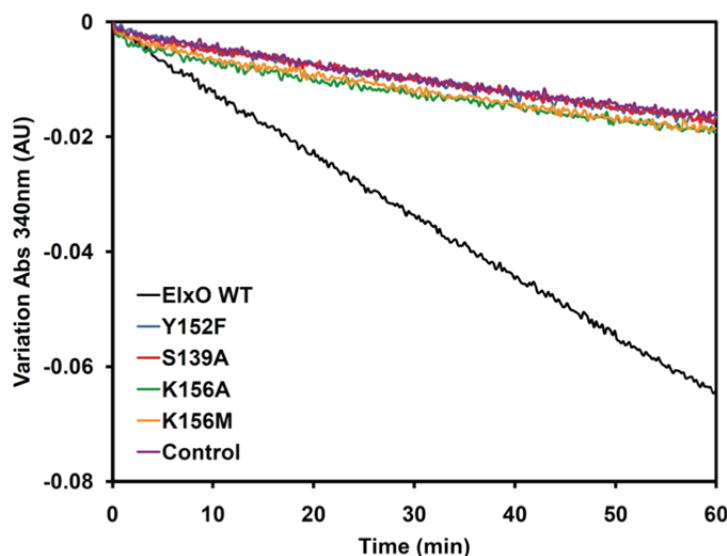

**Supplementary Figure 7.** Consumption of NADPH (2.5 mM) over time upon reduction of Pyr-AAIVK (5.0 mM) by wild-type His<sub>6</sub>-ElxO (black) or the mutants Y152F (blue), S139A (red), K156A (green), or K156M (orange) compared with a control sample lacking peptide (purple).

**Supplementary Table 1.** Accession numbers of proteases used to construct phylogenetic tree (Figure 2b)

| Protease         | Accession Number | Organism                                              |
|------------------|------------------|-------------------------------------------------------|
| CylA             | AFJ74725.1       | <i>Enterococcus faecalis</i>                          |
| LicP             | AAU42937.1       | <i>Bacillus licheniformis</i> DSM 13                  |
| NisP             | ADJ56357.1       | <i>Lactococcus lactis</i> subsp. <i>lactis</i>        |
| NiqP             | BAG71484.1       | <i>Lactococcus lactis</i>                             |
| SlvP             | AEX55163.1       | <i>Streptococcus salivarius</i>                       |
| EpiP             | CAA44257.1       | <i>Staphylococcus epidermidis</i>                     |
| GdmP             | ABC94907.1       | <i>Staphylococcus gallinarum</i>                      |
| BsAa associated  | BAB95626.1       | <i>Staphylococcus aureus</i> subsp. <i>aureus</i> MW2 |
| BsaA1 associated | YP_005737288.1   | <i>Staphylococcus aureus</i> subsp. ED133             |
| NsuP             | ABA00872.1       | <i>Streptococcus uberis</i>                           |
| ElxP             | AFN69433.1       | <i>Staphylococcus epidermidis</i>                     |
| EciP             | CAA74349.1       | <i>Staphylococcus epidermidis</i>                     |
| PepP             | CAA90024.1       | <i>Staphylococcus epidermidis</i>                     |
| Bsn5 associated  | YP_004206152.1   | <i>Bacillus subtilis</i> BSn5                         |

**Supplementary Table 2.** MBP-ElxP cleavage of wild type and His<sub>6</sub>-ElxA mutant peptides\*

| Peptide                   | Full length (calcd) | Leader (calcd) | Unmodified core (calcd) | Result |
|---------------------------|---------------------|----------------|-------------------------|--------|
| His <sub>6</sub> -ElxA wt | 8161 (8162)         | 4865 (4864)    | 3315 (3316)             | +++    |
| Q-1A                      | 8107 (8105)         | 4809 (4807)    | 3315 (3316)             | +      |
| P-2A                      | 8134 (8136)         | 4838 (4838)    | 3314 (3316)             | ++     |
| N-3A                      | 8118 (8119)         | 4822 (4821)    | 3313 (3316)             | ++     |
| L-4A                      | 8119 (8120)         | 4822 (4822)    | 3314 (3316)             | +      |
| D-5A                      | 8115 (8118)         | 4819 (4820)    | 3313 (3316)             | +      |
| F-19A                     | 8086 (8086)         | 4789 (4788)    | 3315 (3316)             | ++     |
| D-18A                     | 8118 (8118)         | 4818 (4820)    | 3314 (3316)             | +++    |
| L-17A                     | 8118 (8120)         | 4823 (4822)    | 3315 (3316)             | +++    |
| N-16A                     | 8119 (8119)         | 4819 (4821)    | 3314 (3316)             | +++    |

\* Observed masses are shown with the calculated mass in parenthesis. Reactions were analyzed by MALDI-TOF MS. Results are based on the amount of substrate left after the assay based on normalized ion intensities. Complete cleavage (+++), partial cleavage (++), marginal cleavage (+).

**Supplementary Table 3.** Peptides tested for reduction by ElxO; all peptides were substrates as confirmed by LC-MS analysis.

| Entry |                     | Substrate |            |
|-------|---------------------|-----------|------------|
| 19    | Non-polar           | Pyr-GAIVK | Pyr-IAIVK  |
|       |                     | Pyr-VAIVK | Pyr-FAIVK  |
| 20    | Polar               | Pyr-TAIVK | Pyr-YAIVK  |
| 21    | Basic               | Pyr-HAIVK |            |
| 22    | Pyr analogs         | Pyr-ASIVK |            |
| 23    | Obu analogs         | Obu-AAAVK | Obu-AAIAK  |
|       |                     | Pyr-AAVLK | Pyr-LGPAIK |
|       |                     | Pyr-APVLA | Obu-AGPAIR |
| 24    | Lantibiotic analogs | Pyr-BPVLA |            |
|       |                     | Pyr-BPVLA | AAVAVAKKK  |

B stands for L-2-aminobutyric acid, Pyr stands for pyruvyl, and Obu stands for 2-oxobutyryl



**Supplementary Table 4.** Data collection, phasing and refinement statistics

|                                                  | ElxO-NADPH               | Y152F ElxO-NADPH         |
|--------------------------------------------------|--------------------------|--------------------------|
| <b>PDB Codes</b>                                 |                          |                          |
| <b>Data collection</b>                           |                          |                          |
| Space Group                                      | C2                       | C2                       |
| a, b, c (Å), $\beta$ ( $^{\circ}$ )              | 131.5, 57.2, 82.3, 121.0 | 131.4, 52.3, 82.4, 121.3 |
| Resolution (Å) <sup>1</sup>                      | 50-1.9 (1.97-1.9)        | 50-1.85 (1.92-1.85)      |
| $R_{\text{sym}}$ (%) <sup>2</sup>                | 6.7 (22.3)               | 5.4 (26.8)               |
| $I/\sigma(I)$                                    | 23.4 (6.0)               | 29.8 (4.2)               |
| Completeness (%)                                 | 97.8 (86.0)              | 95.4 (78.4)              |
| Redundancy                                       | 6.1 (5.2)                | 5.0 (3.9)                |
| <b>Refinement</b>                                |                          |                          |
| Resolution (Å)                                   | 25.0-1.9                 | 25.0-1.85                |
| No. reflections                                  | 35,510                   | 40,626                   |
| $R_{\text{work}} / R_{\text{free}}$ <sup>4</sup> | 16.1/19.6                | 17.9/20.5                |
| <b>Number of atoms</b>                           |                          |                          |
| Protein                                          | 3842                     | 3840                     |
| NADP(H)                                          | 96                       | 96                       |
| Water                                            | 409                      | 328                      |
| <b>B-factors</b>                                 |                          |                          |
| Protein                                          | 24.5                     | 28.8                     |
| NADP(H)                                          | 18.2                     | 22.4                     |
| Water                                            | 33.3                     | 35.2                     |
| <b>R.m.s deviations</b>                          |                          |                          |
| Bond lengths (Å)                                 | 0.007                    | 0.007                    |
| Bond angles ( $^{\circ}$ )                       | 1.23                     | 1.19                     |

1. Highest resolution shell is shown in parenthesis.

2.  $R_{\text{sym}} = \sum |I_i - \langle I_i \rangle| / \sum I_i$  where  $I_i$  = intensity of the  $i$ th reflection and  $\langle I_i \rangle$  = mean intensity.

3. Mean figure of merit (acentric and centric)

4.  $R\text{-factor} = \sum (|F_{\text{obs}}| - k|F_{\text{calc}}|) / \sum |F_{\text{obs}}|$  and  $R\text{-free}$  is the  $R$  value for a test set of reflections consisting of a random 5% of the diffraction data not used in refinement.

**Supplementary Table 5.** Oligonucleotides used in this study

| Name                                 | 5' Sequence 3'                                                             |
|--------------------------------------|----------------------------------------------------------------------------|
| E1xA Q-1A F                          | GCA CAA AAA AGT GAC CTA AAT CCG GCA TCA GCT AGT ATT GTT AAA ACA AC         |
| E1xA Q-1A R                          | GTT GTT TTA ACA ATA CTA GCT GAT GCC GGA TTT AGG TCA CTT TTT TGT GC         |
| E1xA P-2A F                          | GCA CAA AAA AGT GAC CTA AAT GCG CAA TCA GCT AGT ATT GTT AAA ACA AC         |
| E1xA P-2A R                          | GTT GTT TTA ACA ATA CTA GCT GAT TGC GCA TTT AGG TCA CTT TTT TGT GC         |
| E1xA N-3A F                          | ATC GAG GCA CAA AAA AGT GAC CTA GCA CCG CAA TCA GCT                        |
| E1xA N-3A R                          | ACT TTT TTG TGC CTC GAT ATC TTT ATT AAG ATT TAA ATC AAA TAA TTC TTT TTT C  |
| E1xA L-4A F                          | ATC GAG GCA CAA AAA AGT GAC GCA AAT CCG CAA TCA GCT                        |
| E1xA L-4A R                          | ACT TTT TTG TGC CTC GAT ATC TTT ATT AAG ATT TAA ATC AAA TAA TTC TTT TTT C  |
| E1xA D-5A F                          | ATC GAG GCA CAA AAA AGT GCA CTA AAT CCG CAA TCA GCT                        |
| E1xA D-5A R                          | ACT TTT TTG TGC CTC GAT ATC TTT ATT AAG ATT TAA ATC AAA TAA TTC TTT TTT C  |
| E1xA F-19A F                         | GGC AGC CAT ATG AAA AAA GAA TTA GCT GAT TTA AAT CTT AAT AAA GAT ATC G      |
| E1xA F-19A R                         | CGA TAT CTT TAT TAA GAT TTA AAT CAG CTA ATT CTT TTT TCA TAT GGC TGC C      |
| E1xA D-18A F                         | CAG CCA TAT GAA AAA AGA ATT ATT TGC TTT AAA TCT TAA TAA AGA TAT CGA GGC    |
| E1xA D-18A R                         | GCC TCG ATA TCT TTA TTA AGA TTT AAA GCA AAT AAT TCT TTT TTC ATA TGG CTG    |
| E1xA L-17A F                         | GCC ATA TGA AAA AAG AAT TAT TTG ATG CAA ATC TTA ATA AAG ATA TCG AGG C      |
| E1xA L-17A R                         | GCC TCG ATA TCT TTA TTA AGA TTT GCA TCA AAT AAT TCT TTT TTC ATA TGG C      |
| E1xA N-16A F                         | GCC ATA TGA AAA AAG AAT TAT TTG ATT TAG CTC TTA ATA AAG ATA TCG AGG CAC    |
| E1xA N-16A R                         | GTG CCT CGA TAT CTT TAT TAA GAG CTA AAT CAA ATA ATT CTT TTT TCA TAT GGC    |
| NisA R-1Q F                          | CAT CAC CAC AGA TTA CAA GTA TTT CGC TAT GTA CAC CCG GTT G                  |
| NisA R-1Q R                          | CTT GTA ATC TGT GGT GAT GCA CCT GAA TCT TTC TTC GAA ACA G                  |
| NisA R-1Q Q-1_1insA F                | GAT TCA GGT GCA TCA CCA CAG GCA ATT ACA AGT ATT TC                         |
| NisA R-1Q Q-1_1insA R                | TGA TGC ACC TGA ATC TTT CTT CGA AAC AGA TAC CAA ATC                        |
| NisA G-5D A-4L S-3N R-1Q F           | GTT TCG AAG AAA GAT AGC GAT CTG AAT CCA CAG ATT ACA AGT ATT TCG            |
| NisA G-5D A-4L S-3N R-1Q R           | ATC TTT CTT CGA AAC AGA TAC CAA ATC CAA GTT AAA ATC                        |
| NisA G-5D A-4L S-3N R-1Q Q-1_1insA F | GTT TCG AAG AAA GAT TCA GAT CTG AAT CCG CAG GCA ATT ACA AGT ATT TC         |
| NisA G-5D A-4L S-3N R-1Q Q-1_1insA R | TGA ATC TTT CTT CGA AAC AGA TAC CAA ATC CAA GTT AAA ATC TTT TGT ACT C      |
| E1xO_S139A.FP                        | GGA AAT CCG CTT AAT CCT GTA ATA GCA GAA ATA TTT ACT ATT GCT CC             |
| E1xO_Y152F.FP                        | GGA GCA ATA GTA AAT ATT TCT GCT ATT ACA GGA TTA AGC GGA TTT CC             |
| E1xO_Y152F.RP                        | GCG GAT TTC CTT ACT CTA TAT TAT TCG GTA GCA CAA AAC ATG CTG                |
| E1xO_K156A.FP                        | CAG CAT GTT TTG TGC TAC CGA ATA ATA TAG AGT AAG GAA ATC CGC                |
| E1xO_K156A.RP                        | CCT TTA GTT AAA CCA ATA ACA GCA TGT GCT GTG CTA CCG TAT AAT ATA GAG TAA GG |
| E1xO_K156M.FP                        | CCT TAC TCT ATA TTA TAC GGT AGC ACA GCA CAT GCT GTT ATT GGT TTA ACT AAA GG |
| E1xO_K156M.RP                        | CCT TTA GTT AAA CCA ATA ACA GCA TGC ATT GTG CTA CCG TAT AAT ATA GAG TAA GG |
| E1xO_K156M.RP                        | CCT TAC TCT ATA TTA TAC GGT AGC ACA ATG CAT GCT GTT ATT GGT TTA ACT AAA GG |

**Supplementary Table 6.** Microorganisms used in this study

| Strain                                                     | Relevant characteristics                                                                                                                                                         | Source or reference |
|------------------------------------------------------------|----------------------------------------------------------------------------------------------------------------------------------------------------------------------------------|---------------------|
| <i>Escherichia coli</i> DH5 $\alpha$ (plasmid maintenance) | $\lambda$ pir/ $\phi$ 80dlacZ $\Delta$ M15 $\Delta$ (lacZYA-argF)U169 recA1 hsdR17 deoR thi-1 supE44 gyrA96 relA1                                                                | 17                  |
| <i>Escherichia coli</i> BL21 DE3 (protein expression)      | F <sup>-</sup> ompT gal dcm lon hsdS <sub>B</sub> (r <sub>B</sub> <sup>-</sup> m <sub>B</sub> <sup>-</sup> ) $\lambda$ (DE3 [lacI lacUV5-T7 gene 1 ind1 sam7 nin5])              | Novagen             |
| <i>Escherichia coli</i> Rosetta2 (protein expression)      | F <sup>-</sup> ompT gal dcm lon hsdS <sub>B</sub> (r <sub>B</sub> <sup>-</sup> m <sub>B</sub> <sup>-</sup> ) $\lambda$ (DE3 [lacI lacUV5-T7 gene 1 ind1 sam7 nin5]) pRARE2 pLysS | Novagen             |
| <i>Lactobacillus sake</i> L45                              | Lactocin S producer strain                                                                                                                                                       | 18                  |
| <i>Pediococcus acidilactici</i> Pac1.0                     | Lactocin S sensitive strain                                                                                                                                                      | 18                  |

## References

1. Hall, B. G. (2005) Comparison of the accuracies of several phylogenetic methods using protein and DNA sequences, *Mol. Biol. Evol.* 22, 792–802.
2. Ronquist, F., Teslenko, M., van der Mark, P., Ayres, D. L., Darling, A., Hohna, S., Larget, B., Liu, L., Suchard, M. A., and Huelsenbeck, J. P. (2012) MrBayes 3.2: efficient Bayesian phylogenetic inference and model choice across a large model space, *Syst. Biol.* 61, 539–542.
3. Velásquez, J. E., Zhang, X., and van der Donk, W. A. (2011) Biosynthesis of the Antimicrobial Peptide Epilancin 15X and its Unusual N-terminal Lactate Moiety, *Chem. Biol.* 18, 857–867.
4. Liu, H., and Naismith, J. H. (2008) An efficient one-step site-directed deletion, insertion, single and multiple-site plasmid mutagenesis protocol, *BMC Biotechnol.* 8, 91.
5. Garg, N., Salazar-Ocampo, L. M., and van der Donk, W. A. (2013) In vitro activity of the nisin dehydratase NisB, *Proc. Natl. Acad. Sci. U. S. A.* 110, 7258–7263.
6. Ishii, S., Yano, T., and Hayashi, H. (2006) Expression and characterization of the peptidase domain of *Streptococcus pneumoniae* ComA, a bifunctional ATP-binding cassette transporter involved in quorum sensing pathway, *J. Biol. Chem.* 281, 4726–4731.
7. Geoghegan, K. F., and Stroh, J. G. (1992) Site-Directed conjugation of non-peptide groups to peptides and proteins via periodate oxidation of a 2-amino alcohol. Application to modification at N-terminal serine, *Bioconjug. Chem.* 3, 138–146.
8. Ross, A. C., Liu, H., Pattabiraman, V. R., and Vederas, J. C. (2010) Synthesis of the lantibiotic lactocin S using peptide cyclizations on solid phase, *J. Am. Chem. Soc.* 132, 462–463.
9. Otwinowski, Z., Borek, D., Majewski, W., and Minor, W. (2003) Multiparametric scaling of diffraction intensities, *Acta Crystallogr. Sect. A* 59, 228–234.
10. McRee, D. E. (1999) XtalView/Xfit--A versatile program for manipulating atomic coordinates and electron density, *J. Struct. Biol.* 125, 156–165.
11. Perrakis, A., Sixma, T. K., Wilson, K. S., and Lamzin, V. S. (1997) wARP: improvement and extension of crystallographic phases by weighted averaging of multiple-refined dummy atomic models, *Acta Crystallogr. Sect. D- Biol. Crystallogr.* 53, 448–455.
12. Murshudov, G. N., Vagin, A. A., and Dodson, E. J. (1997) Refinement of macromolecular structures by the maximum-likelihood method, *Acta Crystallogr. Sect. D- Biol. Crystallogr.* 53, 240–255.
13. Murshudov, G. N., Vagin, A. A., Lebedev, A., Wilson, K. S., and Dodson, E. J. (1999) Efficient anisotropic refinement of macromolecular structures using FFT, *Acta Crystallogr. Sect. D- Biol. Crystallogr.* 55, 247–255.
14. Kleywegt, G. J., and Brunger, A. T. (1996) Checking your imagination: applications of the free R value, *Structure* 4, 897–904.
15. Laskowski, R. A., Rullmann, J. A., MacArthur, M. W., Kaptein, R., and Thornton, J. M. (1996) AQUA and PROCHECK-NMR: programs for checking the quality of protein structures solved by NMR, *J. Biomol. NMR* 8, 477–486.
16. Delgado, A., Brito, D., Fevereiro, P., Tenreiro, R., and Peres, C. (2005) Bioactivity quantification of crude bacteriocin solutions, *J. Microbiol. Methods* 62, 121–124.
17. Grant, S. G., Jessee, J., Bloom, F. R., and Hanahan, D. (1990) Differential plasmid rescue from transgenic mouse DNAs into *Escherichia coli* methylation-restriction mutants, *Proc. Natl. Acad. Sci. U. S. A.* 87, 4645–4649.
18. Mortvedt, C. I., Nissen-Meyer, J., Sletten, K., and Nes, I. F. (1991) Purification and amino acid sequence of lactocin S, a bacteriocin produced by *Lactobacillus sake* L45, *Appl. Environ. Microbiol.* 57, 1829–1834.
